# Supplementary material for: Hippocampal Volume in Psychiatric Diagnoses: Should Psychiatry Biomarker Research Account for Comorbidities?
Source: PubMed Central journal article supplement — Chronic Stress (Thousand Oaks). 2020 Feb 26;4:2470547020906799. doi: 10.1177/2470547020906799 (PMC7219869; doi:10.1177/2470547020906799), 2020-02-26
Supplement: CCS906799_Supplementary_Data.pdf [file CCS906799_Supplementary_Data.pdf]

## **Supplementary Data**

eTable 1. Group Comparisons of Hippocampal and Amygdalar Volumes

eFigure 1. Effect of Depression Not Otherwise Specified on Hippocampal and Amygdalar Volumes

eTable 2. Correlation Results between Psychiatric Traits and Amygdalar/Hippocampal Volumes: MDD and PC

eTable 3. Correlation Results between Psychiatric Traits and Amygdalar/Hippocampal Volumes: BPD and PC

eTable 4. Correlation Results between Psychiatric Traits and Amygdalar/Hippocampal Volumes: AUD and PC

eTable 5. Correlation Results between Psychiatric Traits and Amygdalar/Hippocampal Volumes: PTSD and PC

eTable 6. Correlation Results between Psychiatric Traits and Amygdalar/Hippocampal Volumes: Psychiatric Patients

**eTable 1. Group Comparisons of Hippocampal and Amygdalar Volumes**

| <b>Major Depressive Disorder</b>       |                                 |                       |                                     |                       |                                  |                       |                                                     |                       |                                                   |                                                  |                       |                                                    |                                                      |          |                                                   |
|----------------------------------------|---------------------------------|-----------------------|-------------------------------------|-----------------------|----------------------------------|-----------------------|-----------------------------------------------------|-----------------------|---------------------------------------------------|--------------------------------------------------|-----------------------|----------------------------------------------------|------------------------------------------------------|----------|---------------------------------------------------|
|                                        | <b>Healthy Controls (N=126)</b> |                       | <b>Psychiatric Controls (N=126)</b> |                       | <b>Group of Interest (N=126)</b> |                       | <b>Healthy Controls versus Psychiatric Controls</b> |                       |                                                   | <b>Healthy Controls versus Group of Interest</b> |                       |                                                    | <b>Psychiatric Controls versus Group of Interest</b> |          |                                                   |
|                                        | <b>Mean</b>                     | <b>Std Err</b>        | <b>Mean</b>                         | <b>Std Err</b>        | <b>Mean</b>                      | <b>Std Err</b>        | <b>F</b>                                            | <b>p</b>              | <b>95% CI</b>                                     | <b>F</b>                                         | <b>p</b>              | <b>95% CI</b>                                      | <b>F</b>                                             | <b>p</b> | <b>95% CI</b>                                     |
| <b>Left Hipp</b>                       | 2.69                            | 2.33*10 <sup>-2</sup> | 2.61                                | 1.93*10 <sup>-2</sup> | 2.61                             | 1.85*10 <sup>-1</sup> | 6.02                                                | 0.015                 | [1.47*10 <sup>-2</sup> , 1.34*10 <sup>-1</sup> ]  | 6.98                                             | 8.79*10 <sup>-3</sup> | [2.00*10 <sup>-2</sup> , 1.37*10 <sup>-1</sup> ]   | 0.82                                                 | 0.37     | [-3.29*10 <sup>-2</sup> , 8.87*10 <sup>-2</sup> ] |
| <b>Right Hipp</b>                      | 2.81                            | 2.18*10 <sup>-2</sup> | 2.71                                | 2.16*10 <sup>-2</sup> | 2.72                             | 2.09*10 <sup>-2</sup> | 10.45                                               | 1.39*10 <sup>-3</sup> | [3.87*10 <sup>-2</sup> , 1.59*10 <sup>-1</sup> ]  | 8.91                                             | 3.13*10 <sup>-3</sup> | [3.063*10 <sup>-2</sup> , 1.50*10 <sup>-1</sup> ]  | 0.42                                                 | 0.52     | [-4.62*10 <sup>-2</sup> , 9.14*10 <sup>-2</sup> ] |
| <b>Left Amyg</b>                       | 1.03                            | 9.79*10 <sup>-3</sup> | 1.01                                | 9.29*10 <sup>-3</sup> | 1.01                             | 8.74*10 <sup>-3</sup> | 2.17                                                | 0.14                  | [-6.72*10 <sup>-3</sup> , 4.64*10 <sup>-2</sup> ] | 3.45                                             | 0.065                 | [-1.49*10 <sup>-3</sup> , 5.02*10 <sup>-2</sup> ]  | 1.11                                                 | 0.29     | [-1.34*10 <sup>-2</sup> , 4.43*10 <sup>-2</sup> ] |
| <b>Right Amyg</b>                      | 1.17                            | 9.75*10 <sup>-3</sup> | 1.14                                | 9.09*10 <sup>-3</sup> | 1.14                             | 8.76*10 <sup>-3</sup> | 4.42                                                | 0.037                 | [1.88*10 <sup>-3</sup> , 5.74*10 <sup>-2</sup> ]  | 6.53                                             | 0.001                 | [7.99*10 <sup>-3</sup> , 6.17*10 <sup>-2</sup> ]   | 4.24                                                 | 0.041    | [1.28*10 <sup>-3</sup> , 5.78*10 <sup>-2</sup> ]  |
| <b>Borderline Personality Disorder</b> |                                 |                       |                                     |                       |                                  |                       |                                                     |                       |                                                   |                                                  |                       |                                                    |                                                      |          |                                                   |
|                                        | <b>Healthy Controls (N=114)</b> |                       | <b>Psychiatric Controls (N=114)</b> |                       | <b>Group of Interest (N=114)</b> |                       | <b>Healthy Controls versus Psychiatric Controls</b> |                       |                                                   | <b>Healthy Controls versus Group of Interest</b> |                       |                                                    | <b>Psychiatric Controls versus Group of Interest</b> |          |                                                   |
|                                        | <b>Mean</b>                     | <b>Std Err</b>        | <b>Mean</b>                         | <b>Std Err</b>        | <b>Mean</b>                      | <b>Std Err</b>        | <b>F</b>                                            | <b>p</b>              | <b>95% CI</b>                                     | <b>F</b>                                         | <b>p</b>              | <b>95% CI</b>                                      | <b>F</b>                                             | <b>p</b> | <b>95% CI</b>                                     |
| <b>Left Hipp</b>                       | 2.69                            | 2.38*10 <sup>-2</sup> | 2.61                                | 2.00*10 <sup>-2</sup> | 2.63                             | 1.93*10 <sup>-2</sup> | 6.78                                                | 0.010                 | [1.97*10 <sup>-2</sup> , 1.42*10 <sup>-1</sup> ]  | 3.68                                             | 0.056                 | [-1.19*10 <sup>-1</sup> , 1.60*10 <sup>-3</sup> ]  | 0.63                                                 | 0.43     | [-3.27*10 <sup>-2</sup> , 7.70*10 <sup>-2</sup> ] |
| <b>Right Hipp</b>                      | 2.82                            | 2.12*10 <sup>-2</sup> | 2.75                                | 2.08*10 <sup>-2</sup> | 2.74                             | 2.09*10 <sup>-2</sup> | 5.29                                                | 0.023                 | [9.71*10 <sup>-3</sup> , 1.27*10 <sup>-1</sup> ]  | 7.13                                             | 8.11*10 <sup>-3</sup> | [-1.38*10 <sup>-1</sup> , -2.09*10 <sup>-2</sup> ] | 0.15                                                 | 0.703    | [-6.95*10 <sup>-2</sup> , 4.69*10 <sup>-2</sup> ] |
| <b>Left Amyg</b>                       | 1.04                            | 1.01*10 <sup>-2</sup> | 1.01                                | 8.84*10 <sup>-3</sup> | 1.02                             | 8.54*10 <sup>-3</sup> | 4.70                                                | 0.031                 | [2.65*10 <sup>-3</sup> , 5.55*10 <sup>-2</sup> ]  | 2.38                                             | 0.12                  | [-4.64*10 <sup>-2</sup> , 5.64*10 <sup>-3</sup> ]  | 0.498                                                | 0.481    | [-1.55*10 <sup>-2</sup> , 3.29*10 <sup>-2</sup> ] |
| <b>Right Amyg</b>                      | 1.18                            | 9.94*10 <sup>-3</sup> | 1.14                                | 8.14*10 <sup>-3</sup> | 1.14                             | 8.90*10 <sup>-3</sup> | 9.63                                                | 2.16*10 <sup>-3</sup> | [1.51*10 <sup>-2</sup> , 6.77*10 <sup>-2</sup> ]  | 9.78                                             | 2.00*10 <sup>-3</sup> | [-6.55*10 <sup>-2</sup> , -1.49*10 <sup>-2</sup> ] | 0.010                                                | 0.92     | [-2.26*10 <sup>-2</sup> , 2.50*10 <sup>-2</sup> ] |

**eTable 1. Group Comparisons of Hippocampal and Amygdalar Volumes Continued**

| <b>Alcohol Use Disorder</b>           |                                 |                       |                                     |                       |                                  |                       |                                                     |          |                                                    |                                                  |                       |                                                    |                                                      |          |                                                   |
|---------------------------------------|---------------------------------|-----------------------|-------------------------------------|-----------------------|----------------------------------|-----------------------|-----------------------------------------------------|----------|----------------------------------------------------|--------------------------------------------------|-----------------------|----------------------------------------------------|------------------------------------------------------|----------|---------------------------------------------------|
|                                       | <b>Healthy Controls (N=136)</b> |                       | <b>Psychiatric Controls (N=136)</b> |                       | <b>Group of Interest (N=136)</b> |                       | <b>Healthy Controls versus Psychiatric Controls</b> |          |                                                    | <b>Healthy Controls versus Group of Interest</b> |                       |                                                    | <b>Psychiatric Controls versus Group of Interest</b> |          |                                                   |
|                                       | <b>Mean</b>                     | <b>Std Err</b>        | <b>Mean</b>                         | <b>Std Err</b>        | <b>Mean</b>                      | <b>Std Err</b>        | <b>F</b>                                            | <b>p</b> | <b>95% CI</b>                                      | <b>F</b>                                         | <b>p</b>              | <b>95% CI</b>                                      | <b>F</b>                                             | <b>p</b> | <b>95% CI</b>                                     |
| <b>Left Hipp</b>                      | 2.68                            | 2.14*10 <sup>-2</sup> | 2.63                                | 1.96*10 <sup>-2</sup> | 2.64                             | 1.81*10 <sup>-2</sup> | 3.09                                                | 0.080    | [-6.13*10 <sup>-3</sup> , 1.09*10 <sup>-1</sup> ]  | 2.37                                             | 0.13                  | [-9.83*10 <sup>-2</sup> , 1.21*10 <sup>-2</sup> ]  | 0.105                                                | 0.75     | [-4.38*10 <sup>-2</sup> , 6.11*10 <sup>-2</sup> ] |
| <b>Right Hipp</b>                     | 2.8                             | 2.02*10 <sup>-2</sup> | 2.74                                | 2.13*10 <sup>-2</sup> | 2.74                             | 1.89*10 <sup>-2</sup> | 4.54                                                | 0.034    | [4.76*10 <sup>-3</sup> , 1.21*10 <sup>-1</sup> ]   | 4.52                                             | 0.34                  | [-1.13*10 <sup>-1</sup> , -4.38*10 <sup>-3</sup> ] | 0.025                                                | 0.88     | [-5.16*10 <sup>-2</sup> , 6.06*10 <sup>-2</sup> ] |
| <b>Left Amyg</b>                      | 1.04                            | 9.87*10 <sup>-3</sup> | 1.02                                | 8.36*10 <sup>-3</sup> | 1.02                             | 8.77*10 <sup>-3</sup> | 1.44                                                | 0.23     | [-9.80*10 <sup>-3</sup> , 4.03*10 <sup>-2</sup> ]  | 2.14                                             | 0.14                  | [-5.43*10 <sup>-2</sup> , 6.67*10 <sup>-3</sup> ]  | 0.12                                                 | 0.73     | [-2.74*10 <sup>-2</sup> , 1.92*10 <sup>-2</sup> ] |
| <b>Right Amyg</b>                     | 1.17                            | 9.85*10 <sup>-3</sup> | 1.16                                | 8.11*10 <sup>-3</sup> | 1.14                             | 8.49*10 <sup>-3</sup> | 1.43                                                | 0.23     | [-9.90*10 <sup>-3</sup> , 4.05*10 <sup>-2</sup> ]  | 5.12                                             | 0.024                 | [-5.50*10 <sup>-2</sup> , -3.82*10 <sup>-3</sup> ] | 1.38                                                 | 0.24     | [-3.69*10 <sup>-2</sup> , 9.35*10 <sup>-2</sup> ] |
| <b>Post-Traumatic Stress Disorder</b> |                                 |                       |                                     |                       |                                  |                       |                                                     |          |                                                    |                                                  |                       |                                                    |                                                      |          |                                                   |
|                                       | <b>Healthy Controls (N=68)</b>  |                       | <b>Psychiatric Controls (N=68)</b>  |                       | <b>Group of Interest (N=68)</b>  |                       | <b>Healthy Controls versus Psychiatric Controls</b> |          |                                                    | <b>Healthy Controls versus Group of Interest</b> |                       |                                                    | <b>Psychiatric Controls versus Group of Interest</b> |          |                                                   |
|                                       | <b>Mean</b>                     | <b>Std Err</b>        | <b>Mean</b>                         | <b>Std Err</b>        | <b>Mean</b>                      | <b>Std Err</b>        | <b>F</b>                                            | <b>p</b> | <b>95% CI</b>                                      | <b>F</b>                                         | <b>p</b>              | <b>95% CI</b>                                      | <b>F</b>                                             | <b>p</b> | <b>95% CI</b>                                     |
| <b>Left Hipp</b>                      | 2.71                            | 3.06*10 <sup>-2</sup> | 2.64                                | 2.40*10 <sup>-2</sup> | 2.62                             | 2.43*10 <sup>-2</sup> | 3.14                                                | 0.079    | [1.46*10 <sup>-1</sup> , 7.98*10 <sup>-3</sup> ]   | 5.44                                             | 0.021                 | [1.39*10 <sup>-2</sup> , 1.68*10 <sup>-1</sup> ]   | 0.43                                                 | 0.52     | [-4.52*10 <sup>-2</sup> , 8.96*10 <sup>-2</sup> ] |
| <b>Right Hipp</b>                     | 2.85                            | 2.73*10 <sup>-2</sup> | 2.75                                | 2.56*10 <sup>-2</sup> | 2.73                             | 2.12*10 <sup>-2</sup> | 6.64                                                | 0.011    | [-1.71*10 <sup>-1</sup> , -2.25*10 <sup>-2</sup> ] | 11.54                                            | 8.99*10 <sup>-1</sup> | [4.90*10 <sup>-2</sup> , 1.86*10 <sup>-1</sup> ]   | 0.39                                                 | 0.53     | [-4.50*10 <sup>-2</sup> , 8.66*10 <sup>-2</sup> ] |

Mean and standard error shown after divided by total intracranial volume (and multiplied by 1000 for scaling). ANCOVA results shown for major depressive disorder. Note effect of covariate (depression not otherwise specified is shown in a different figure). T-test results shown for all other disorders. Amyg: amygdala; Hipp: hippocampus; Std Err: Standard error

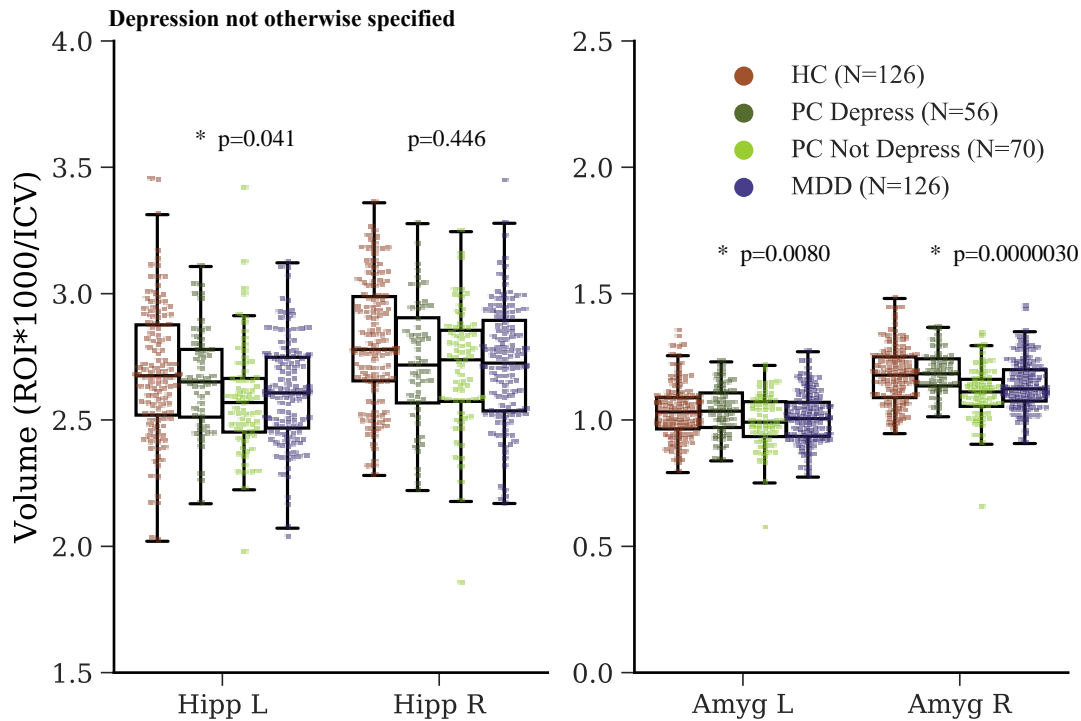

**eFigure 1. Effect of Depression Not Otherwise Specified on Hippocampal and Amygdalar Volumes**

Effect of depression not otherwise specified as a covariate in the major depression disorder versus psychiatric controls comparison. Data is divided by ICV and multiplied by 1000 for scaling. P values indicate the effect of the covariate (\* $p < 0.05$ ). Left hippocampus:  $F=4.20$ ;  $p=0.041$ ; 95% CI [ $2.97 \times 10^{-3}$ ,  $1.47 \times 10^{-1}$ ]; Depress:  $2.66 \pm 2.02 \times 10^{-1}$ ; not Depress  $2.58 \pm 2.39 \times 10^{-1}$ . Right hippocampus:  $F=0.582$ ;  $p=0.446$ ; 95% CI [ $-5.01 \times 10^{-2}$ ,  $1.13 \times 10^{-1}$ ]; Depress:  $2.72 \pm 2.48 \times 10^{-1}$ , not Depress  $2.70 \pm 2.39 \times 10^{-1}$ . Left amygdala:  $F=7.12$ ;  $p=8.04 \times 10^{-3}$ ; 95% CI [ $4.76 \times 10^{-2}$ ,  $1.15 \times 10^{-1}$ ]; Depress:  $1.04 \pm 9.37 \times 10^{-2}$ , not Depress  $9.94 \times 10^{-1} \pm 1.09 \times 10^{-1}$ . Right amygdala:  $F=22.68$ ;  $p=3.00 \times 10^{-6}$ ; 95% CI [ $1.22 \times 10^{-2}$ ,  $8.072 \times 10^{-2}$ ]; Depress:  $1.19 \pm 8.24 \times 10^{-2}$ , not Depress  $1.11 \pm 1.09 \times 10^{-1}$ . Amyg: amygdala; HC: healthy controls; Hipp: hippocampus; ICV: total intracranial volume; L: left; MDD: major depressive disorder; PC Depress: psychiatric controls with depression not otherwise specified; PC not Depress: psychiatric controls without depression not otherwise specified; R: right; ROI: region of interest.

**eTable 2. Correlation Results between Psychiatric Traits and Amygdalar/Hippocampal Volumes: MDD and PC**

|               |                    | Trauma Score |        | Substance Use Score |        | DERS Total Score |        | PHQ-9  |        | GAD-7  |        |
|---------------|--------------------|--------------|--------|---------------------|--------|------------------|--------|--------|--------|--------|--------|
|               |                    | PC           | MDD    | PC                  | MDD    | PC               | MDD    | PC     | MDD    | PC     | MDD    |
| <b>Hipp L</b> | <i>Pearson's r</i> | 0.043        | -0.034 | -0.109              | 0.011  | -0.022           | 0.074  | -0.009 | 0.057  | 0.046  | 0.035  |
|               | <i>p value</i>     | 0.635        | 0.707  | 0.227               | 0.907  | 0.811            | 0.415  | 0.923  | 0.530  | 0.610  | 0.701  |
| <b>Hipp R</b> | <i>Pearson's r</i> | 0.091        | 0.017  | -0.038              | -0.080 | 0.005            | 0.091  | -0.129 | 0.017  | 0.018  | -0.089 |
|               | <i>p value</i>     | 0.316        | 0.854  | 0.673               | 0.378  | 0.952            | 0.314  | 0.152  | 0.849  | 0.844  | 0.324  |
| <b>Amyg L</b> | <i>Pearson's r</i> | -0.105       | -0.090 | -0.122              | -0.104 | -0.039           | -0.016 | 0.016  | -0.072 | -0.131 | -0.088 |
|               | <i>p value</i>     | 0.244        | 0.321  | 0.178               | 0.250  | 0.669            | 0.860  | 0.864  | 0.429  | 0.148  | 0.331  |
| <b>Amyg R</b> | <i>Pearson's r</i> | 0.015        | -0.091 | -0.034              | -0.105 | -0.105           | 0.031  | 0.017  | -0.035 | -0.137 | -0.058 |
|               | <i>p value</i>     | 0.870        | 0.317  | 0.704               | 0.246  | 0.245            | 0.732  | 0.853  | 0.702  | 0.128  | 0.522  |

Correlations for each group (PC (N=126) and MDD (N=126)) were performed between hippocampal/amygdalar volumes and psychiatric traits. Hippocampal and amygdalar volumes were divided by total intracranial volume. Trauma scores were taken from the Stressful Life Events Screening Questionnaire. Amyg: Amygdala; DERS: Difficulties in emotion regulation; GAD: Generalized anxiety disorder; Hipp: Hippocampus; L: Left; PC: Psychiatric controls; PHQ: Patient health questionnaire; MDD: Major depressive disorder; R: Right.

**eTable 3. Correlation Results between Psychiatric Traits and Amygdalar/Hippocampal Volumes: BPD and PC**

|               |                    | Trauma Score |        | Substance Use Score |        | DERS Total Score |        | PHQ-9  |        | GAD-7  |        |
|---------------|--------------------|--------------|--------|---------------------|--------|------------------|--------|--------|--------|--------|--------|
|               |                    | PC           | BPD    | PC                  | BPD    | PC               | BPD    | PC     | BPD    | PC     | BPD    |
| <b>Hipp L</b> | <i>Pearson's r</i> | 0.025        | -0.002 | -0.033              | -0.012 | 0.013            | 0.006  | 0.153  | -0.168 | 0.071  | -0.098 |
|               | <i>p value</i>     | 0.794        | 0.979  | 0.731               | 0.898  | 0.889            | 0.952  | 0.107  | 0.076  | 0.459  | 0.302  |
| <b>Hipp R</b> | <i>Pearson's r</i> | 0.035        | -0.149 | -0.010              | -0.154 | 0.072            | 0.090  | 0.192  | -0.114 | 0.120  | -0.066 |
|               | <i>p value</i>     | 0.717        | 0.116  | 0.915               | 0.104  | 0.449            | 0.343  | 0.042* | 0.232  | 0.208  | 0.488  |
| <b>Amyg L</b> | <i>Pearson's r</i> | 0.038        | 0.025  | -0.136              | 0.024  | -0.022           | -0.039 | 0.040  | -0.077 | -0.042 | -0.084 |
|               | <i>p value</i>     | 0.688        | 0.797  | 0.154               | 0.804  | 0.817            | 0.682  | 0.676  | 0.420  | 0.657  | 0.379  |
| <b>Amyg R</b> | <i>Pearson's r</i> | 0.001        | 0.060  | -0.126              | 0.072  | 0.052            | -0.041 | 0.166  | -0.152 | 0.054  | -0.242 |
|               | <i>p value</i>     | 0.993        | 0.532  | 0.186               | 0.450  | 0.589            | 0.668  | 0.081  | 0.110  | 0.572  | 0.010* |

Correlations for each group (PC (N=114) and BPD (N=114)) were performed between hippocampal/amygdalar volumes and psychiatric traits. Hippocampal and amygdalar volumes were divided by total intracranial volume. Trauma scores were taken from the Stressful Life Events Screening Questionnaire. Amyg: Amygdala; DERS: Difficulties in emotion regulation; GAD: Generalized anxiety disorder; Hipp: Hippocampus; L: Left; PC: Psychiatric controls; PHQ: Patient health questionnaire; MDD: Major depressive disorder; R: Right. \* p < 0.05.

**eTable 4. Correlation Results between Psychiatric Traits and Amygdalar/Hippocampal Volumes: AUD and PC**

|               |                    | Trauma Score |        | Substance Use Score |        | DERS Total Score |        | PHQ-9  |        | GAD-7  |        |
|---------------|--------------------|--------------|--------|---------------------|--------|------------------|--------|--------|--------|--------|--------|
|               |                    | PC           | AUD    | PC                  | AUD    | PC               | AUD    | PC     | AUD    | PC     | AUD    |
| <b>Hipp L</b> | <i>Pearson's r</i> | -0.064       | -0.002 | 0.036               | -0.141 | -0.088           | -0.081 | -0.093 | -0.132 | -0.117 | -0.116 |
|               | <i>p value</i>     | 0.463        | 0.982  | 0.683               | 0.104  | 0.315            | 0.355  | 0.286  | 0.127  | 0.178  | 0.181  |
| <b>Hipp R</b> | <i>Pearson's r</i> | 0.011        | 0.065  | -0.019              | -0.074 | -0.054           | 0.015  | -0.132 | -0.067 | -0.158 | -0.035 |
|               | <i>p value</i>     | 0.899        | 0.456  | 0.830               | 0.393  | 0.534            | 0.865  | 0.129  | 0.439  | 0.069  | 0.688  |
| <b>Amyg L</b> | <i>Pearson's r</i> | -0.025       | -0.003 | 0.043               | -0.088 | -0.061           | 0.048  | -0.131 | -0.073 | -0.145 | -0.092 |
|               | <i>p value</i>     | 0.776        | 0.968  | 0.618               | 0.315  | 0.486            | 0.584  | 0.132  | 0.403  | 0.094  | 0.289  |
| <b>Amyg R</b> | <i>Pearson's r</i> | -0.003       | 0.077  | 0.001               | -0.024 | -0.051           | -0.038 | -0.063 | -0.074 | -0.100 | -0.166 |
|               | <i>p value</i>     | 0.969        | 0.379  | 0.992               | 0.780  | 0.557            | 0.664  | 0.467  | 0.396  | 0.251  | 0.055  |

Correlations for each group (PC (N=136) and AUD (N=136)) were performed between hippocampal/amygdalar volumes and psychiatric traits. Hippocampal and amygdalar volumes were divided by total intracranial volume. Trauma scores were taken from the Stressful Life Events Screening Questionnaire. Amyg: Amygdala; DERS: Difficulties in emotion regulation; GAD: Generalized anxiety disorder; Hipp: Hippocampus; L: Left; PC: Psychiatric controls; PHQ: Patient health questionnaire; MDD: Major depressive disorder; R: Right.

**eTable 5. Correlation Results between Psychiatric Traits and Amygdalar/Hippocampal Volumes: PTSD and PC**

|               |                    | Trauma Score |        | Substance Use Score |        | DERS Total Score |       | PHQ-9  |        | GAD-7  |        |
|---------------|--------------------|--------------|--------|---------------------|--------|------------------|-------|--------|--------|--------|--------|
|               |                    | PC           | PTSD   | PC                  | PTSD   | PC               | PTSD  | PC     | PTSD   | PC     | PTSD   |
| <b>Hipp L</b> | <i>Pearson's r</i> | 0.183        | -0.230 | -0.221              | 0.051  | 0.008            | 0.151 | -0.027 | -0.094 | -0.055 | 0.046  |
|               | <i>p value</i>     | 0.140        | 0.063  | 0.074               | 0.683  | 0.947            | 0.227 | 0.830  | 0.454  | 0.662  | 0.712  |
| <b>Hipp R</b> | <i>Pearson's r</i> | 0.190        | -0.143 | -0.153              | -0.013 | 0.031            | 0.088 | 0.035  | -0.269 | 0.011  | -0.074 |
|               | <i>p value</i>     | 0.127        | 0.252  | 0.219               | 0.919  | 0.806            | 0.484 | 0.779  | 0.029* | 0.929  | 0.557  |

Correlations for each group (PC (N=68) and PTSD (N=68)) were performed between hippocampal/amygdalar volumes and psychiatric traits. Hippocampal and amygdalar volumes were divided by total intracranial volume. Trauma scores were taken from the Stressful Life Events Screening Questionnaire. Amyg: Amygdala; DERS: Difficulties in emotion regulation; GAD: Generalized anxiety disorder; Hipp: Hippocampus; L: Left; PC: Psychiatric controls; PHQ: Patient health questionnaire; MDD: Major depressive disorder; R: Right.  
\* p <0.05.

**eTable 6. Correlation Results between Psychiatric Traits and Amygdalar/Hippocampal Volumes: Psychiatric Patients**

|               |                    | <b>Trauma Score</b> | <b>Substance Use Score</b> | <b>DERS Total Score</b> | <b>PHQ-9</b> | <b>GAD-7</b> |
|---------------|--------------------|---------------------|----------------------------|-------------------------|--------------|--------------|
| <b>Hipp L</b> | <i>Pearson's r</i> | -0.038              | -0.040                     | -0.026                  | -0.083       | -0.050       |
|               | <i>p value</i>     | 0.382               | 0.364                      | 0.548                   | 0.059        | 0.256        |
| <b>Hipp R</b> | <i>Pearson's r</i> | -0.019              | -0.057                     | -0.002                  | -0.072       | -0.055       |
|               | <i>p value</i>     | 0.673               | 0.192                      | 0.967                   | 0.100        | 0.209        |
| <b>Amyg L</b> | <i>Pearson's r</i> | -0.032              | -0.065                     | -0.050                  | -0.097       | -0.102       |
|               | <i>p value</i>     | 0.463               | 0.138                      | 0.259                   | 0.027*       | 0.020*       |
| <b>Amyg R</b> | <i>Pearson's r</i> | -0.017              | -0.074                     | -0.063                  | -0.070       | -0.099       |
|               | <i>p value</i>     | 0.707               | 0.092                      | 0.149                   | 0.112        | 0.025*       |

Correlations for each all psychiatric patients (N=522) were performed between hippocampal/amygdalar volumes and psychiatric traits. Hippocampal and amygdalar volumes were divided by total intracranial volume. Trauma scores were taken from the Stressful Life Events Screening Questionnaire. Amyg: Amygdala; DERS: Difficulties in emotion regulation; GAD: Generalized anxiety disorder; Hipp: Hippocampus; L: Left; PC: Psychiatric controls; PHQ: Patient health questionnaire; MDD: Major depressive disorder; R: Right.  
\* p <0.05.
